# Supplementary material for: Graphene nanoplatelets-sericin surface-modified Gum alloy for improved biological response
Source: Royal Society of Chemistry journal article supplement (doi:10.1039/c8ra01784k), 2018-01-01
Supplement: c8ra01784k1.pdf [file c8ra01784k1.pdf]

## Supplementary information

### Graphene-Nanoplatelets-Sericin Surface-Modified Gum Alloy for Improved Biological Response

Valentina Mitran<sup>a</sup>; Valentina Dinca<sup>b</sup>; Raluca Ion<sup>a\*</sup>; Vasile D Cojocaru<sup>c</sup>; Patricia Neacsu<sup>a</sup>; Cerasela Zoica Dinu<sup>d</sup>; Laurentiu Rusen<sup>b</sup>; Simona Brajnicov<sup>b,e</sup>; Anca Bonciu<sup>b,f</sup>; Maria Dinescu<sup>b</sup>; Doina Raducanu<sup>c</sup>; Ioan Dan<sup>g</sup>; Anisoara Cimpean<sup>a\*</sup>

<sup>a</sup>University of Bucharest, Department of Biochemistry and Molecular Biology, 91-95 Spl. Independentei, 050095, Bucharest, Romania

<sup>b</sup>National Institute for Lasers, Plasma and Radiation Physics, 409 Atomistilor Street, PO Box MG-16, 077125, Magurele, Bucharest, Romania

<sup>c</sup>University POLITEHNICA of Bucharest, 313 Spl. Independentei, 060042 Bucharest, Romania

<sup>d</sup>West Virginia University, Department of Chemical and Biomedical Engineering, Morgantown, West Virginia 26506, United States

<sup>e</sup>University of Craiova, Faculty of Mathematics and Natural Science, 13 Alexandru Ioan Cuza, 200585 Craiova, Romania

<sup>f</sup>University of Bucharest, Faculty of Physics, 405 Atomistilor, 077125 Bucharest- Magurele, Romania

<sup>g</sup> SC R&D Consultanta si Servicii SRL, 45 Maria Ghiculeasa, 020943 Bucharest, Romania

\*Corresponding authors:

E-mail address: anisoara.cimpean@bio.unibuc.ro

rciubar@yahoo.com

Tel.: +40 21 3181575/106; Fax: +40 21 3181575/ 102

University of Bucharest, Department of Biochemistry and Molecular Biology, 91-95 Spl. Independentei, 050095, Bucharest, Romania

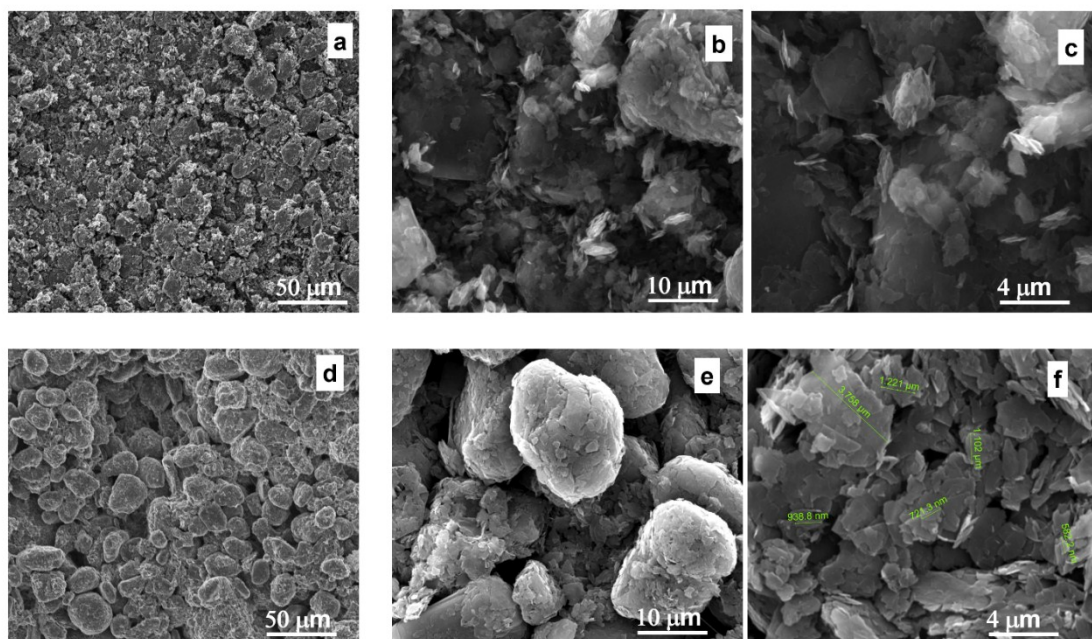

**Fig. S1** SEM images of powder at different magnification (a-c) and of the drop casted solution of GNP after the sonication process (d-f). It can be observed higher density of nanoplatelets present onto the powder sample, while for the sonicated one, due to water and drying process, the smaller nanoplatelets are found between the aggregates. However, the sonication helps in detaching nanoplatelets from the aggregates, which is helpful in MAPLE process, where smaller particles are easier to be transported onto the substrates than bigger ones and helps as well to obtain more homogenous coatings.

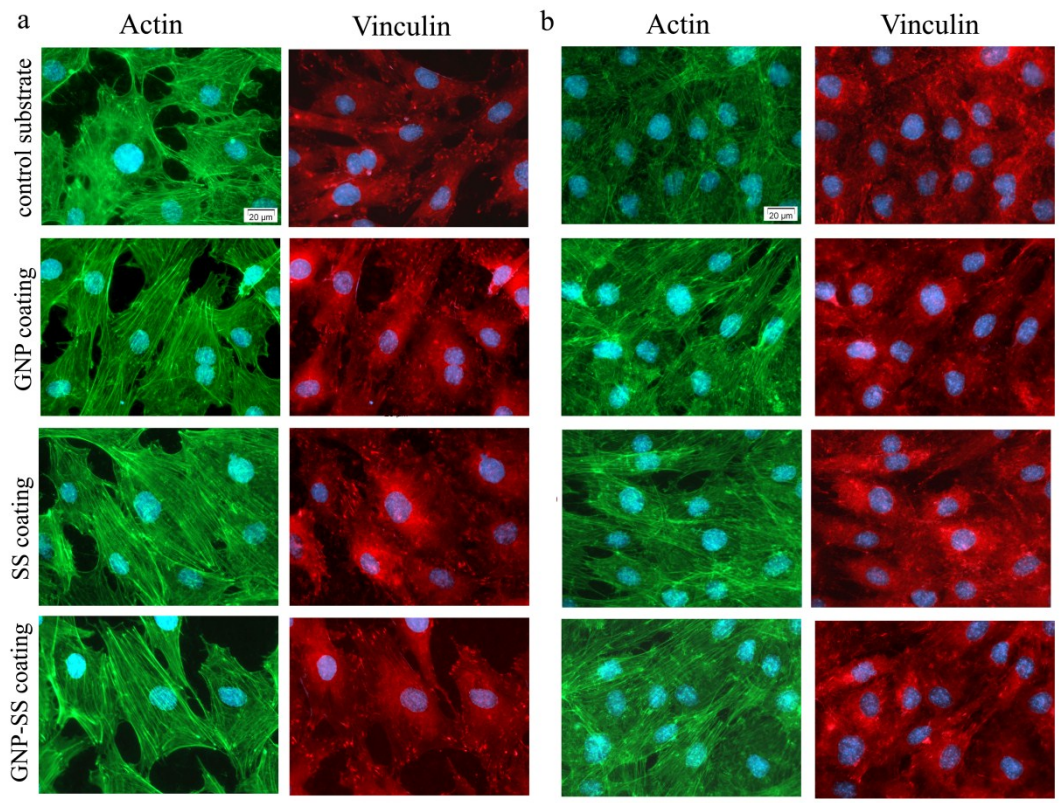

**Fig. S2** Fluorescent images of MC3T3-E1 pre-osteoblasts grown on uncoated and GNP-, SS- and GNP-SS- coated Gum alloy for 1 day (a) and 5 days (b) respectively. Green fluorescence: actin cytoskeleton; Red fluorescence: vinculin signals. Scale bar: 20  $\mu\text{m}$ .

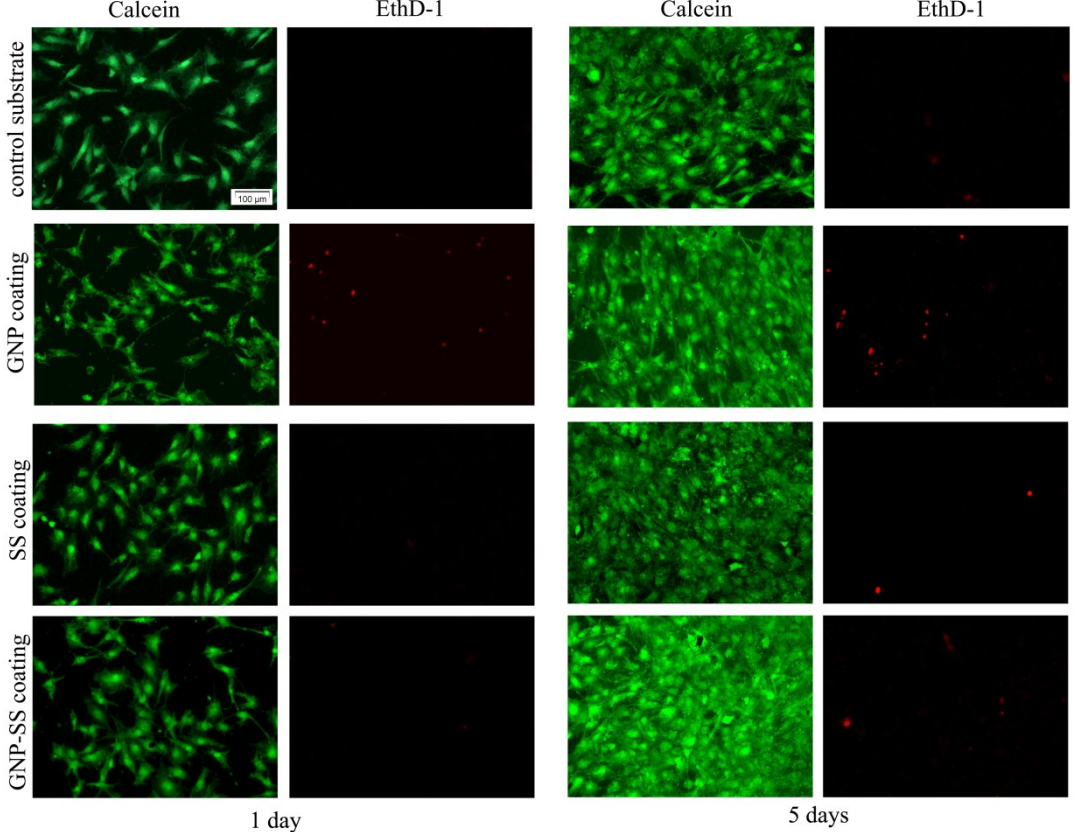

**Fig. S3** Fluorescent cell staining with LIVE/DEAD Cell Viability/Cytotoxicity Assay Kit after 1 day and 5 days of culture (live cells fluorescence green and dead cells fluorescence red). Scale bar: 100  $\mu\text{m}$ .

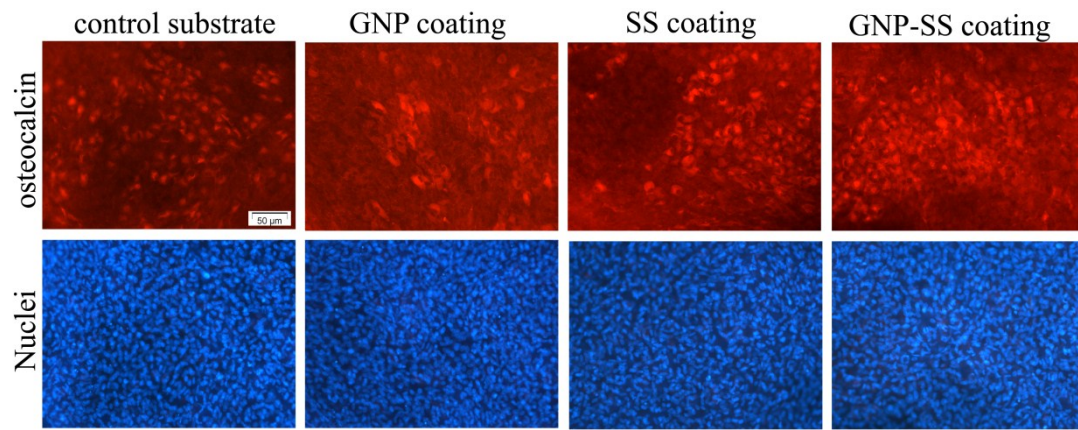

**Fig. S4** Fluorescent immunolabeling of osteocalcin protein expression and cell nuclei stained with DAPI in MC3T3-E1 pre-osteoblasts grown for 3 weeks on control substrate and GNP-, SS- and GNP-SS- coated Gum alloy. Red fluorescence: osteocalcin; Blue fluorescence: nuclei. Scale bar: 50 μm
